# Supplementary material for: A polynomial time biclustering algorithm for finding approximate expression patterns in gene expression time series
Source: Springer Nature journal article supplement (doi:10.1186/1748-7188-4-8), 2009-06-04
Supplement: Additional file 3 [file 1748-7188-4-8-s3.pdf]

**Highly significant 1-CCC-Biclusters**

| #  | ID  | Sorting p-value | Variation Pattern | #Time Points (first-last) | #Genes |
|----|-----|-----------------|-------------------|---------------------------|--------|
| 1  | 10  | 0.00E-00        | DDNU              | 5 (1-5)                   | 1079   |
| 2  | 27  | 0.00E-00        | DNUU              | 5 (1-5)                   | 597    |
| 3  | 45  | 0.00E-00        | DDU               | 4 (2-5)                   | 1264   |
| 4  | 49  | 0.00E-00        | DNU               | 4 (2-5)                   | 1467   |
| 5  | 53  | 0.00E-00        | DUU               | 4 (2-5)                   | 1356   |
| 6  | 64  | 0.00E-00        | NDDU              | 5 (1-5)                   | 670    |
| 7  | 79  | 0.00E-00        | NNND              | 5 (1-5)                   | 849    |
| 8  | 92  | 0.00E-00        | NUND              | 5 (1-5)                   | 1151   |
| 9  | 132 | 0.00E-00        | UNDD              | 5 (1-5)                   | 539    |
| 10 | 149 | 0.00E-00        | UUND              | 5 (1-5)                   | 1142   |
| 11 | 161 | 0.00E-00        | UND               | 4 (2-5)                   | 1803   |
| 12 | 136 | 8.31E-42        | UNND              | 5 (1-5)                   | 665    |
| 13 | 145 | 2.81E-41        | UDD               | 5 (1-5)                   | 511    |
| 14 | 157 | 6.05E-41        | UDD               | 4 (2-5)                   | 1538   |
| 15 | 165 | 1.04E-38        | UUD               | 4 (2-5)                   | 1577   |
| 16 | 14  | 1.36E-37        | DDUU              | 5 (1-5)                   | 521    |
| 17 | 67  | 1.19E-35        | NDNN              | 5 (1-5)                   | 754    |
| 18 | 96  | 2.05E-35        | NUUD              | 5 (1-5)                   | 765    |
| 19 | 68  | 1.65E-33        | NDNU              | 5 (1-5)                   | 800    |
| 20 | 48  | 1.28E-29        | DNN               | 4 (2-5)                   | 1298   |
| 21 | 72  | 5.34E-29        | NDUU              | 5 (1-5)                   | 646    |
| 22 | 105 | 2.09E-24        | NND               | 4 (2-5)                   | 1579   |
| 23 | 26  | 6.43E-21        | DNUN              | 5 (1-5)                   | 452    |
| 24 | 125 | 9.88E-20        | UDNU              | 5 (1-5)                   | 750    |
| 25 | 19  | 1.45E-17        | DNDU              | 5 (1-5)                   | 614    |
| 26 | 153 | 8.31E-17        | UUUD              | 5 (1-5)                   | 475    |
| 27 | 22  | 2.30E-16        | DNNN              | 5 (1-5)                   | 515    |
| 28 | 97  | 4.15E-15        | NUUN              | 5 (1-5)                   | 385    |
| 29 | 88  | 1.07E-14        | NUDD              | 5 (1-5)                   | 702    |
| 30 | 6   | 1.20E-14        | DDDU              | 5 (1-5)                   | 427    |
| 31 | 9   | 1.10E-11        | DDNN              | 5 (1-5)                   | 454    |
| 32 | 61  | 4.72E-11        | NDD               | 4 (1-4)                   | 909    |
| 33 | 131 | 3.27E-10        | UND               | 4 (1-4)                   | 749    |
| 34 | 120 | 5.12E-10        | UDDN              | 5 (1-5)                   | 307    |
| 35 | 63  | 1.99E-09        | NDDN              | 5 (1-5)                   | 292    |
| 36 | 39  | 2.88E-09        | DUUN              | 5 (1-5)                   | 430    |
| 37 | 24  | 1.21E-08        | DNU               | 4 (1-4)                   | 866    |
| 38 | 148 | 2.27E-08        | UUN               | 4 (1-4)                   | 1434   |
| 39 | 34  | 1.13E-07        | DUND              | 5 (1-5)                   | 936    |
| 40 | 80  | 1.77E-07        | NNNN              | 5 (1-5)                   | 301    |
| 41 | 69  | 4.02E-07        | NDU               | 4 (1-4)                   | 1191   |
| 42 | 78  | 8.94E-07        | NNN               | 4 (1-4)                   | 1224   |
| 43 | 122 | 9.16E-07        | UDN               | 4 (1-4)                   | 1462   |
| 44 | 7   | 1.12E-06        | DDN               | 4 (1-4)                   | 1321   |
| 45 | 91  | 1.23E-06        | NUN               | 4 (1-4)                   | 1335   |
| 46 | 95  | 2.02E-06        | NUU               | 4 (1-4)                   | 1125   |
| 47 | 75  | 3.62E-05        | NNDD              | 5 (1-5)                   | 198    |
