# Supplementary material for: A polynomial time biclustering algorithm for finding approximate expression patterns in gene expression time series
Source: Springer Nature journal article supplement (doi:10.1186/1748-7188-4-8), 2009-06-04
Supplement: Additional file 4 [file 1748-7188-4-8-s4.pdf]

**Highly significant CCC-Biclusters**

| #  | ID  | Sorting p-value | Variation Pattern | #Time Points (first-last) | #Genes |
|----|-----|-----------------|-------------------|---------------------------|--------|
| 1  | 124 | 2.56E-84        | DNU               | 4 (2-5)                   | 904    |
| 2  | 107 | 1.59E-75        | NDNU              | 5 (1-5)                   | 518    |
| 3  | 14  | 1.64E-58        | UND               | 4 (2-5)                   | 1091   |
| 4  | 27  | 3.69E-44        | UUND              | 5 (1-5)                   | 290    |
| 5  | 39  | 8.65E-42        | UNND              | 5 (1-5)                   | 258    |
| 6  | 163 | 1.07E-39        | DDNU              | 5 (1-5)                   | 260    |
| 7  | 84  | 2.91E-38        | NUND              | 5 (1-5)                   | 568    |
| 8  | 151 | 3.99E-31        | DNNU              | 5 (1-5)                   | 232    |
| 9  | 48  | 1.35E-26        | UDUD              | 5 (1-5)                   | 182    |
| 10 | 142 | 2.84E-24        | DUDU              | 5 (1-5)                   | 248    |
| 11 | 43  | 6.56E-24        | UNDD              | 5 (1-5)                   | 109    |
| 12 | 147 | 6.03E-21        | DNUU              | 5 (1-5)                   | 144    |
| 13 | 141 | 6.28E-21        | DUD               | 4 (1-4)                   | 408    |
| 14 | 45  | 1.45E-17        | UDU               | 4 (1-4)                   | 302    |
| 15 | 83  | 1.90E-16        | NUNN              | 5 (1-5)                   | 224    |
| 16 | 146 | 1.58E-11        | DNU               | 4 (1-4)                   | 415    |
| 17 | 42  | 3.30E-11        | UNDN              | 5 (1-5)                   | 131    |
| 18 | 148 | 6.00E-11        | DNUN              | 5 (1-5)                   | 192    |
| 19 | 40  | 7.60E-11        | UND               | 4 (1-4)                   | 298    |
| 20 | 106 | 1.04E-08        | NDNN              | 4 (1-6)                   | 664    |
| 21 | 159 | 1.37E-07        | DDUU              | 5 (1-5)                   | 56     |
| 22 | 79  | 4.41E-07        | NUUN              | 5 (1-5)                   | 97     |
| 23 | 81  | 7.53E-06        | NUN               | 4 (1-4)                   | 839    |
| 24 | 92  | 3.88E-05        | NNUN              | 5 (1-5)                   | 52     |
| 25 | 99  | 4.79E-05        | NNDN              | 5 (1-5)                   | 39     |
