# Supplementary material for: A polynomial time biclustering algorithm for finding approximate expression patterns in gene expression time series
Source: Springer Nature journal article supplement (doi:10.1186/1748-7188-4-8), 2009-06-04
Supplement: Additional file 5 [file 1748-7188-4-8-s5.pdf]

### Highly significant 1-CCC-Biclusters versus highly significant CCC-Biclusters

| #  | ID  | <i>p</i> -value | Pattern | Time Points | #Genes | Corresponding CCC-Biclusters                                                                              |
|----|-----|-----------------|---------|-------------|--------|-----------------------------------------------------------------------------------------------------------|
| 1  | 10  | 0.00E-00        | DDNU    | 1-5         | 1079   | #1(ID 124) → Extended with genes and column at left<br>#8 (ID 151) and #21 (ID 159) → Extended with genes |
| 2  | 27  | 0.00E-00        | DNUU    | 1-5         | 597    | #12(ID 147), #8(ID 151), #18(ID 148) and #21(ID 159)<br>→ Extended with genes                             |
| 3  | 45  | 0.00E-00        | DDU     | 2-5         | 1264   | #1(ID 124) → Extended with genes                                                                          |
| 4  | 49  | 0.00E-00        | DNU     | 2-5         | 1467   | #1(ID 124) → Extended with genes                                                                          |
| 5  | 53  | 0.00E-00        | DUU     | 2-5         | 1356   | #1(ID 124) → Extended with genes                                                                          |
| 6  | 64  | 0.00E-00        | NDDU    | 1-5         | 670    |                                                                                                           |
| 7  | 79  | 0.00E-00        | NNND    | 1-5         | 849    | #5(ID 39) → Extended with genes                                                                           |
| 8  | 92  | 0.00E-00        | NUND    | 1-5         | 1151   | #3(ID 14) → Extended with genes and column at left<br>#4(ID 27) and #15(ID 83) → Extended with genes      |
| 9  | 132 | 0.00E-00        | UNDD    | 1-5         | 539    | #11(ID 43), #5(ID 39) and #17(ID 42)<br>→ Extended with genes                                             |
| 10 | 149 | 0.00E-00        | UUND    | 1-5         | 1142   | #3(ID 14) → Extended with genes and column at left<br>#4(ID 27) and #5(ID 39) → Extended with genes       |
| 11 | 161 | 0.00E-00        | UND     | 2-5         | 1803   | #3(ID 14) → Extended with genes                                                                           |
| 12 | 136 | 8.31E-42        | UNND    | 1-5         | 665    | #5(ID 39), #4(ID 27) and #11(ID 43)<br>→ Extended with genes                                              |
| 13 | 145 | 2.81E-41        | UDD     | 1-5         | 511    | #4(ID 27) and #11(ID 43) → Extended with genes                                                            |
| 14 | 157 | 6.05E-41        | UDD     | 2-5         | 1538   | #3(ID 14) → Extended with genes                                                                           |
| 15 | 165 | 1.04E-38        | UUD     | 2-5         | 1577   | #3(ID 14) → Extended with genes                                                                           |
| 16 | 14  | 1.36E-37        | DDUU    | 1-5         | 521    | #21(ID 159) and #12(ID 147) → Extended with genes                                                         |
| 17 | 67  | 1.19E-35        | NDNN    | 1-5         | 754    | #15(ID 83) → Extended with genes                                                                          |
| 18 | 96  | 2.05E-35        | NUUD    | 1-5         | 765    | #22(ID 79) → Extended with genes                                                                          |
| 19 | 68  | 1.65E-33        | NDNU    | 1-5         | 800    |                                                                                                           |
| 20 | 48  | 1.28E-29        | DNN     | 2-5         | 1298   | #1(ID 124) → Extended with genes                                                                          |
| 21 | 72  | 5.34E-29        | NDUU    | 1-5         | 646    | #21(ID 159) → Extended with genes                                                                         |
| 22 | 105 | 2.09E-24        | NND     | 2-5         | 1579   | #3 (ID 14) → Extended with genes                                                                          |
| 23 | 26  | 6.43E-21        | DNUN    | 1-5         | 452    | #18(ID 148), #24(ID 92) and #12(ID 147)<br>→ Extended with genes                                          |
| 24 | 125 | 9.88E-20        | UDNU    | 1-5         | 750    |                                                                                                           |
| 25 | 19  | 1.45E-17        | DNDU    | 1-5         | 614    | #10(ID 142) and #8(ID 151) → Extended with genes                                                          |
| 26 | 153 | 8.31E-17        | UUUD    | 1-5         | 475    | #4(ID 27) → Extended with genes                                                                           |
| 27 | 22  | 2.30E-16        | DNNN    | 1-5         | 515    | #8(ID 151) and #18(ID 148) → Extended with genes                                                          |
| 28 | 97  | 4.15E-15        | NUUN    | 1-5         | 385    | #22(ID 79), #15 (ID 83) and #24 (ID 92)<br>→ Extended with genes                                          |
| 29 | 88  | 1.07E-14        | NUDD    | 1-5         | 702    |                                                                                                           |
| 30 | 6   | 1.20E-14        | DDDU    | 1-5         | 427    |                                                                                                           |
| 31 | 9   | 1.10E-11        | DDNN    | 1-5         | 454    |                                                                                                           |
| 32 | 61  | 4.72E-11        | NDD     | 1-4         | 909    |                                                                                                           |
| 33 | 131 | 3.27E-10        | UND     | 1-4         | 749    |                                                                                                           |
| 34 | 120 | 5.12E-10        | UDDN    | 1-5         | 307    | #17(ID 42) → Extended with genes                                                                          |
| 35 | 63  | 1.99E-09        | NDDN    | 1-5         | 292    | #25(ID 99) → Extended with genes                                                                          |
| 36 | 39  | 2.88E-09        | DUUN    | 1-5         | 430    | #18(ID 148) and #22(ID 79) → Extended with genes                                                          |
| 37 | 24  | 1.21E-08        | DNU     | 1-4         | 866    |                                                                                                           |
| 38 | 148 | 2.27E-08        | UUN     | 1-4         | 1434   |                                                                                                           |
| 39 | 34  | 1.13E-07        | DUND    | 1-5         | 936    |                                                                                                           |
| 40 | 80  | 1.77E-07        | NNNN    | 1-5         | 301    | #15(ID 83), #24(ID 92) and #25(ID 99)<br>→ Extended with genes                                            |
| 41 | 69  | 4.02E-07        | NDU     | 1-4         | 1191   |                                                                                                           |
| 42 | 78  | 8.94E-07        | NNN     | 1-4         | 1224   |                                                                                                           |
| 43 | 122 | 9.16E-07        | UDN     | 1-4         | 1462   |                                                                                                           |
| 44 | 7   | 1.12E-06        | DDN     | 1-4         | 1321   |                                                                                                           |
| 45 | 91  | 1.23E-06        | NUN     | 1-4         | 1335   |                                                                                                           |
| 46 | 95  | 2.02E-06        | NUU     | 1-4         | 1125   |                                                                                                           |
| 47 | 75  | 3.62E-05        | NNDD    | 1-5         | 198    | #25(ID 99) and #8(ID 43) → Extended with genes                                                            |
