# Supplementary material for: A polynomial time biclustering algorithm for finding approximate expression patterns in gene expression time series
Source: Springer Nature journal article supplement (doi:10.1186/1748-7188-4-8), 2009-06-04
Supplement: Additional file 6 [file 1748-7188-4-8-s6.pdf]

### GO terms enriched and transcriptional regulations of the top 16 CCC-Biclusters

| <i>ID</i> | <i>#Genes</i> | <i>TFs</i><br>( <i>Top 10</i> )                                                         | <i>%</i>                                                                     | <i>GO Terms Enriched</i><br>( <i>Top 10</i> )                                                                                                                                                                                                                                                                                                                                                        | <i>DF</i>                                                                              | <i>p-value (level)</i>                                                                                                                                     |
|-----------|---------------|-----------------------------------------------------------------------------------------|------------------------------------------------------------------------------|------------------------------------------------------------------------------------------------------------------------------------------------------------------------------------------------------------------------------------------------------------------------------------------------------------------------------------------------------------------------------------------------------|----------------------------------------------------------------------------------------|------------------------------------------------------------------------------------------------------------------------------------------------------------|
| 124       | 904           | Yap1p<br>Sfp1p<br>Met4p<br>Rap1p<br>Rpn4p<br>Arr1p<br>Sok2p<br>Ihf1p<br>Fhl1p<br>Ino4p  | 32.1<br>29.6<br>24.5<br>18.7<br>16.9<br>14.5<br>11.7<br>11.6<br>11.6<br>9.7  | ribonucleoprotein complex biogenesis and assembly<br>ribosome biogenesis and assembly<br>organelle organization and biogenesis<br>RNA processing<br>rRNA metabolic process<br>RNA metabolic process<br>rRNA processing<br>nucleobase, nucleoside, nucleotide and nucleic acid metabolic process<br>cellular component organization and biogenesis<br>ribosomal large subunit biogenesis and assembly | 31.10<br>27.91<br>43.06<br>22.65<br>15.47<br>34.93<br>14.83<br>44.34<br>56.78<br>6.54  | 5.62E-81(4)<br>1.76E-76(5)<br>3.08E-38(4)<br>3.75E-37(6)<br>9.12E-36(6)<br>1.02E-33(5)<br>1.10E-33(6,7)<br>1.12E-33(4)<br>3.69E-32(3)<br>1.29E-26(6,5)     |
| 14        | 1091          | Yap1p<br>Met4p<br>Sok2p<br>Aft1p<br>Hsf1p<br>Msn2p<br>Rpn4p<br>Msn4p<br>Arr1p<br>Ino4p  | 28.8<br>24.4<br>19.5<br>18.5<br>17.1<br>16.7<br>15.8<br>14.5<br>11.9<br>10.6 | carbohydrate metabolic process<br>catabolic process<br>cellular catabolic process<br>generation of precursor metabolites and energy<br>cellular carbohydrate metabolic process<br>response to stress<br>energy derivation by oxidation of organic compounds<br>macromolecule catabolic process<br>cellular macromolecule catabolic process<br>energy reserve metabolic process                       | 10.87<br>15.55<br>15.04<br>8.85<br>9.48<br>16.06<br>6.95<br>11.88<br>10.49<br>2.91     | 2.77E-23(4)<br>6.27E-21(3)<br>3.83E-20(4)<br>4.15E-20(3)<br>5.08E-19(5)<br>1.53E-18(3)<br>7.57E-16(4)<br>3.33E-15(4)<br>9.17E-13(5)<br>3.71E-12(5)         |
| 27        | 290           | Met4p<br>Yap1p<br>Sok2p<br>Aft1p<br>Hsf1p<br>Msn2p<br>Rpn4p<br>Msn4p<br>Arr1p<br>Ino4p  | 27.7<br>27.0<br>26.0<br>24.9<br>22.1<br>19.4<br>17.3<br>16.6<br>15.2<br>13.1 | carbohydrate metabolic process<br>response to stress<br>regulation of carbohydrate metabolic process<br>energy reserve metabolic process<br>regulation of metabolic process<br>cellular carbohydrate metabolic process<br>regulation of biosynthetic process<br>regulation of biological process<br>cell communication<br>carbohydrate biosynthetic process                                          | 13.64<br>19.32<br>4.55<br>4.55<br>18.18<br>1023<br>5.68<br>22.73<br>10.80<br>5.68      | 1.04E-08(4)<br>1.53E-07(3)<br>6.28E-07(5,4)<br>6.91E-06(5)<br>1.01E-05(4,3)<br>1.23E-05(5)<br>1.24E-05(5,4)<br>1.34E-05(3)<br>1.74E-05(3)*<br>3.25E-05(5)* |
| 39        | 258           | Sok2p<br>Yap1p<br>Met4p<br>Arr1p<br>Hsf1p<br>Aft1p<br>Rpn4p<br>Msn2p<br>Nrg1p<br>Ino4p  | 27.3<br>21.9<br>19.5<br>14.5<br>14.1<br>14.1<br>12.5<br>12.5<br>11.7<br>11.7 |                                                                                                                                                                                                                                                                                                                                                                                                      |                                                                                        |                                                                                                                                                            |
| 151       | 232           | Yap1p<br>Swi4p<br>Met4p<br>Mbp1p<br>Sok2p<br>Arr1p<br>Ste12p<br>Rpn4p<br>Aft1p<br>Ino4p | 18.1<br>13.8<br>10.8<br>10.3<br>10.3<br>9.5<br>9.1<br>8.2<br>7.8<br>7.3      | cellular component organization and biogenesis<br>cell cycle<br>cell cycle process<br>nucleobase, nucleoside, nucleotide and nucleic acid metabolic process<br>cell cycle phase<br>mitotic cell cycle<br>organelle organization and biogenesis<br>biopolymer metabolic process<br>primary metabolic process<br>cellular metabolic process                                                            | 57.89<br>20.53<br>20.00<br>43.16<br>16.84<br>13.68<br>37.89<br>52.63<br>66.84<br>68.95 | 3.14E-11(3)<br>5.39E-10(3)<br>5.85E-10(4,3)<br>8.64E-10(4)<br>5.22E-09(5,4)<br>3.58E-08(4)<br>6.50E-08(4)<br>7.40E-08(4)<br>9.08E-07(3)<br>1.20E-06(3)     |
| 48        | 182           | Sok2p<br>Yap1p<br>Arr1p                                                                 | 15.0<br>15.0<br>12.2                                                         |                                                                                                                                                                                                                                                                                                                                                                                                      |                                                                                        |                                                                                                                                                            |

|     |     |        |      |                                                          |       |               |
|-----|-----|--------|------|----------------------------------------------------------|-------|---------------|
|     |     | Met4p  | 11.7 |                                                          |       |               |
|     |     | Ste12p | 11.1 |                                                          |       |               |
|     |     | Aft1p  | 10.0 |                                                          |       |               |
|     |     | Rpn4p  | 8.9  |                                                          |       |               |
|     |     | Nrg1p  | 8.9  |                                                          |       |               |
|     |     | Hap4p  | 8.9  |                                                          |       |               |
|     |     | Mga1p  | 7.8  |                                                          |       |               |
| 142 | 248 | Yap1p  | 23.8 | cellular component organization and biogenesis           | 57.89 | 3.14E-11(3)   |
|     |     | Met4p  | 13.3 | transcription, DNA-dependent                             | 18.95 | 5.58E-07(7,6) |
|     |     | Sok2p  | 12.9 | RNA biosynthetic process                                 | 18.95 | 6.11E-07(7,6) |
|     |     | Ste12p | 12.1 | microtubule-based process                                | 7.37  | 9.93E-07(6)   |
|     |     | Abf1p  | 10.1 | transcription                                            | 19.47 | 1.42E-06(5)   |
|     |     | Arr1p  | 10.1 | chromosome organization and biogenesis (sensu Eukaryota) | 19.47 | 1.42E-06(6)   |
|     |     | Mbp1p  | 8.9  | chromosome organization and biogenesis                   | 19.47 | 1.75E-06(5)   |
|     |     | Yox1p  | 8.5  | microtubule cytoskeleton organization and biogenesis     | 6.32  | 2.93E-06(7)   |
|     |     | Rpn4p  | 8.1  | regulation of transcription, DNA-dependent               | 14.21 | 3.36E-06(8,7) |
|     |     | Rap1p  | 7.7  | regulation of transcription                              | 14.74 | 4.35E-06(7,6) |
|     |     | Cbf1p  | 7.7  |                                                          |       |               |
| 43  | 109 | Sok2p  | 19.4 | response to chemical stimulus                            | 20.31 | 5.58E-05(3)*  |
|     |     | Yap1p  | 18.5 |                                                          |       |               |
|     |     | Yox1p  | 13.9 |                                                          |       |               |
|     |     | Ste12p | 13.9 |                                                          |       |               |
|     |     | Met4p  | 13.0 |                                                          |       |               |
|     |     | Aft1p  | 13.0 |                                                          |       |               |
|     |     | Skn7p  | 12.0 |                                                          |       |               |
|     |     | Swi4p  | 12.0 |                                                          |       |               |
|     |     | Rpn4p  | 12.0 |                                                          |       |               |
|     |     | Arr1p  | 11.1 |                                                          |       |               |
|     |     | Rap1p  | 11.1 |                                                          |       |               |
|     |     | Tec1p  | 11.1 |                                                          |       |               |
| 147 | 144 | Ste12p | 16.0 |                                                          |       |               |
|     |     | Yap1p  | 16.0 |                                                          |       |               |
|     |     | Rap1p  | 13.2 |                                                          |       |               |
|     |     | Sok2p  | 12.5 |                                                          |       |               |
|     |     | Met4p  | 12.5 |                                                          |       |               |
|     |     | Swi4p  | 12.5 |                                                          |       |               |
|     |     | Leu3p  | 11.8 |                                                          |       |               |
|     |     | Rpn4p  | 11.1 |                                                          |       |               |
|     |     | Phd1p  | 10.4 |                                                          |       |               |
|     |     | Ino4p  | 9.7  |                                                          |       |               |
|     |     | Tec1p  | 9.7  |                                                          |       |               |
| 83  | 224 | Yap1p  | 29.0 | response to stress                                       | 16.56 | 6.23E-05(3)*  |
|     |     | Met4p  | 22.8 |                                                          |       |               |
|     |     | Sok2p  | 17.9 |                                                          |       |               |
|     |     | Hsf1p  | 17.0 |                                                          |       |               |
|     |     | Rpn4p  | 16.1 |                                                          |       |               |
|     |     | Aft1p  | 16.1 |                                                          |       |               |
|     |     | Arr1p  | 15.2 |                                                          |       |               |
|     |     | Ste12p | 12.1 |                                                          |       |               |
|     |     | Msn2p  | 10.7 |                                                          |       |               |
|     |     | Rap1p  | 10.3 |                                                          |       |               |
| 42  | 131 | Yap1p  | 22.1 | cellular component organization and biogenesis           | 54.95 | 3.95E-05(3)*  |
|     |     | Aft1p  | 20.6 |                                                          |       |               |
|     |     | Sok2p  | 19.1 |                                                          |       |               |
|     |     | Hsf1p  | 18.3 |                                                          |       |               |
|     |     | Met4p  | 18.3 |                                                          |       |               |
|     |     | Ste12p | 13.7 |                                                          |       |               |
|     |     | Msn2p  | 13.0 |                                                          |       |               |
|     |     | Phd1p  | 13.0 |                                                          |       |               |

|     |     |        |      |                                          |        |                 |
|-----|-----|--------|------|------------------------------------------|--------|-----------------|
|     |     | Arr1p  | 13.0 |                                          |        |                 |
|     |     | Msn4p  | 11.5 |                                          |        |                 |
| 148 | 192 | Met4p  | 21.9 | lipid metabolic process                  | 11.49  | 2.41E-05(4)*    |
|     |     | Yap1p  | 20.8 | cellular lipid metabolic process         | 10.81  | 4.45E-05(4,5)*  |
|     |     | Sok2p  | 15.6 | protein modification process             | 17.57  | 6.48E-05(6)*    |
|     |     | Ste12p | 13.0 | ER to Golgi vesicle-mediated transport   | 6.08   | 7.22E-05(5-8)*  |
|     |     | Swi4p  | 11.5 |                                          |        |                 |
|     |     | Rap1p  | 11.5 |                                          |        |                 |
|     |     | Phd1p  | 9.9  |                                          |        |                 |
|     |     | Gcn4p  | 9.4  |                                          |        |                 |
|     |     | Rpn4p  | 9.4  |                                          |        |                 |
|     |     | Abf1p  | 9.4  |                                          |        |                 |
|     |     | Mbp1p  | 9.4  |                                          |        |                 |
| 159 | 56  | Yap1p  | 33.9 | cellular biosynthetic process            | 0.2500 | 1.93E-05(4)     |
|     |     | Met4p  | 17.9 | regulation of translational initiation   | 6.82   | 3.36E-05(6-8)*  |
|     |     | Sfp1p  | 17.9 |                                          |        |                 |
|     |     | Cbf1p  | 14.3 |                                          |        |                 |
|     |     | Gcn4p  | 12.5 |                                          |        |                 |
|     |     | Yox1p  | 12.5 |                                          |        |                 |
|     |     | Pho4p  | 12.5 |                                          |        |                 |
|     |     | Leu3p  | 10.7 |                                          |        |                 |
|     |     | Rpn4p  | 10.7 |                                          |        |                 |
|     |     | Rap1p  | 10.7 |                                          |        |                 |
| 79  | 97  | Yap1p  | 33.0 | carboxylic acid metabolic process        | 19.72  | 4.75E-06(5)     |
|     |     | Met4p  | 22.7 | organic acid metabolic process           | 19.72  | 4.75E-06(4)     |
|     |     | Sok2p  | 19.6 | phosphatidylcholine biosynthetic process | 4.23   | 4.24E-05(8-10)* |
|     |     | Rpn4p  | 18.6 | phosphatidylcholine metabolic process    | 4.23   | 9.96E-05(8,9)*  |
|     |     | Arr1p  | 17.5 |                                          |        |                 |
|     |     | Gcn4p  | 16.5 |                                          |        |                 |
|     |     | Hsf1p  | 13.4 |                                          |        |                 |
|     |     | Leu3p  | 11.3 |                                          |        |                 |
|     |     | Crz1p  | 11.3 |                                          |        |                 |
|     |     | Ste12p | 11.3 |                                          |        |                 |
|     |     | Aft1p  | 11.3 |                                          |        |                 |
| 92  | 52  | Yap1p  | 32.7 | nitrogen compound metabolic process      | 28.57  | 4.55E-07(3)     |
|     |     | Sok2p  | 23.1 | amine metabolic process                  | 22.86  | 1.93E-05(4)     |
|     |     | Leu3p  | 19.2 |                                          |        |                 |
|     |     | Met4p  | 19.2 |                                          |        |                 |
|     |     | Rpn4p  | 15.4 |                                          |        |                 |
|     |     | Ino4p  | 15.4 |                                          |        |                 |
|     |     | Ste12p | 15.4 |                                          |        |                 |
|     |     | Tec1p  | 13.5 |                                          |        |                 |
|     |     | Hap4p  | 13.5 |                                          |        |                 |
|     |     | Gcn4p  | 13.5 |                                          |        |                 |
| 99  | 39  | Yap1p  | 28.2 | organelle inheritance                    | 13.79  | 2.58E-05(5)     |
|     |     | Ste12p | 20.5 |                                          |        |                 |
|     |     | Sok2p  | 20.5 |                                          |        |                 |
|     |     | Met4p  | 17.9 |                                          |        |                 |
|     |     | Rap1p  | 15.4 |                                          |        |                 |
|     |     | Sfp1p  | 15.4 |                                          |        |                 |
|     |     | Rpn4p  | 12.8 |                                          |        |                 |
|     |     | Leu3p  | 12.8 |                                          |        |                 |
|     |     | Yox1p  | 12.8 |                                          |        |                 |
|     |     | Cin5p  | 12.8 |                                          |        |                 |
|     |     | Hsf1p  | 12.8 |                                          |        |                 |
|     |     | Ifh1p  | 12.8 |                                          |        |                 |
